# Supplementary material for: Developing piezochromic luminescent materials via regioselective cyanation of naphthalimide–cyanostilbene derivatives
Source: Royal Society of Chemistry journal article supplement (doi:10.1039/d4qm00531g), 2024-01-01
Supplement: d4qm00531g1.pdf [file d4qm00531g1.pdf]

## Supporting Information

### Developing Piezochromic Luminescent Materials via Regioselective Cyanation of Naphthalimide-Cyanostilbene Derivatives

Hao Jia,<sup>‡a</sup> Xuening Sun,<sup>‡c</sup> Xinmiao Meng,<sup>a</sup> Min Wu,<sup>a</sup> Aisen Li,<sup>a</sup> Miao Yang,<sup>b</sup> Chengyuan Wang,<sup>\*b</sup> Jiaxiang Yang,<sup>\*b</sup> Kai Wang,<sup>a</sup> Qian Li,<sup>\*a</sup> and Lei Li<sup>\*a</sup>

- <sup>a</sup> School of Physics Science and Information Technology, Shandong Key Laboratory of Optical Communication Science and Technology, Liaocheng University, Liaocheng 25200, China.  
E-mail: [liqian@lcu.edu.cn](mailto:liqian@lcu.edu.cn), [leili@lcu.edu.cn](mailto:leili@lcu.edu.cn)
- <sup>b</sup> School of Chemistry and Chemical Engineering, Key Laboratory of Structure and Functional Regulation of Hybrid Materials of Ministry of Education, Anhui University, Hefei 230601, China.  
E-mail: [chengyuan.wang@ahu.edu.cn](mailto:chengyuan.wang@ahu.edu.cn), [jxyang@ahu.edu.cn](mailto:jxyang@ahu.edu.cn)
- <sup>c</sup> State Key Laboratory of Superhard Materials, College of Physics, Jilin University, Changchun 130012, China.

<sup>‡</sup> These authors have contributed equally to this work.

\* Corresponding authors.

E-mail addresses:

[chengyuan.wang@ahu.edu.cn](mailto:chengyuan.wang@ahu.edu.cn) (C. Wang)

[jxyang@ahu.edu.cn](mailto:jxyang@ahu.edu.cn) (J. Yang)

[liqian@lcu.edu.cn](mailto:liqian@lcu.edu.cn) (Q. Li)

[leili@lcu.edu.cn](mailto:leili@lcu.edu.cn) (L. Li)

## Experimental Details

### Sample preparation

All the chemicals used in this work are purchased from commercial suppliers without purification. Analytical nuclear magnetic resonance (NMR) spectra were recorded on Bruker AVANCE NEO 500, at a constant temperature of 298 K. Chemical shifts are reported in  $\delta$  values in ppm using tetramethylsilane (TMS) or residual solvent as internal standard and coupling constants ( $J$ ) are denoted in Hz. Multiplicities are denoted as follows: s = singlet, d = doublet, t = triplet, dd = double doublet and m = multiplet. The detailed synthesized methods are shown below:

**NICNa-R** (R = 1C, 2C, 3C and 4C) were synthesized according to the previous report.<sup>1</sup> The intermediate compound **5** (1.40 mmol) and compound **2** (1.68 mmol, R = 1C, 2C, 3C and 4C) were added to the ethanol (80 mL) in a 250 mL round-bottom flask. The solution was refluxed continuously to dissolve all the precursors. The obtained solution was then added *t*-BuOK (2.80 mmol), and further stirred for 6 h. Finally, the solution was filtrated to achieve the targeted sample. The samples were purified by column chromatography to obtain desired product (petroleum ether: CH<sub>2</sub>Cl<sub>2</sub> = 1:3, v/v).

**NICNa-1C**, light yellow solid, 80% yield. <sup>1</sup>H NMR (500 MHz, CDCl<sub>3</sub>, ppm)  $\delta$ : 8.64 (d,  $J$  = 7.5 Hz, 2H), 8.08 (d,  $J$  = 8.5 Hz, 1H), 7.74 – 7.69 (m, 1H), 7.67 (d,  $J$  = 7.5 Hz, 1H), 7.54 – 7.49 (m, 2H), 7.48 – 7.44 (m, 2H), 7.35 – 7.31 (m, 2H), 6.92 – 6.88 (m, 2H), 5.34 (s, 1H), 4.25 – 4.19 (m, 2H), 3.82 (s, 3H), 1.78 – 1.71 (m, 2H), 1.51 – 1.43 (m, 2H), 0.99 (t,  $J$  = 7.5 Hz, 3H). <sup>13</sup>C NMR (125 MHz, CDCl<sub>3</sub>, ppm)  $\delta$ : 13C NMR (126 MHz, Chloroform-d)  $\delta$  164.17, 163.97, 160.07, 145.29, 139.21, 135.26, 132.01, 131.25, 131.05, 130.67, 130.29, 129.85, 128.61, 128.34, 127.76, 127.05, 124.81, 123.04, 122.25, 121.66, 114.14, 55.30, 48.22, 40.30, 30.20, 20.38, 13.84.

**NICNa-2C**, yellow solid, 80% yield. <sup>1</sup>H NMR (500 MHz, CDCl<sub>3</sub>, ppm)  $\delta$ : 8.65 (d,  $J$  = 7.5 Hz, 2H), 8.10 – 8.07 (m, 1H), 7.72 (dd,  $J$  = 8.5, 7.2 Hz, 1H), 7.67 (d,  $J$  = 7.5 Hz, 1H), 7.51 (d,  $J$  = 8.5 Hz, 2H), 7.46 (d,  $J$  = 8.5 Hz, 2H), 7.33 – 7.29 (m, 2H), 6.92 – 6.84 (m, 2H), 5.33 (s, 1H), 4.24 – 4.19 (m, 2H), 4.07 – 4.00 (m, 2H), 1.79 – 1.71 (m, 2H), 1.52 – 1.44 (m, 2H), 1.42 (t,  $J$  = 7.0 Hz, 3H), 1.00 (t,  $J$  = 7.5 Hz, 3H). <sup>13</sup>C NMR (125 MHz, CDCl<sub>3</sub>, ppm)  $\delta$ : 164.24, 164.03, 161.16, 145.69, 142.56, 139.16, 135.20, 132.23, 131.41, 131.24, 130.74, 130.54, 129.92, 128.71, 127.79, 127.03, 126.12, 126.00, 123.05, 122.13, 118.41, 114.96, 107.56, 63.76, 40.30, 30.22, 20.39, 14.69, 13.84.

**NICNa-3C**, light yellow solid, 83% yield. <sup>1</sup>H NMR (500 MHz, CDCl<sub>3</sub>, ppm)  $\delta$ : 8.68 – 8.63 (m, 2H), 8.28 – 8.25 (m, 1H), 7.96 – 7.91 (m, 2H), 7.86 – 7.82 (m, 2H), 7.75 – 7.70 (m, 2H), 7.61 – 7.56 (m, 3H), 7.03 – 6.98 (m, 2H), 4.22 (t,  $J$  = 7.5 Hz, 2H), 4.01 (t,  $J$  = 6.5 Hz, 2H), 1.90 – 1.81 (m, 2H), 1.79 – 1.71 (m, 2H), 1.52 – 1.43 (m, 2H), 1.07 (t,  $J$  = 7.5 Hz, 3H), 0.99 (t,  $J$  = 7.5 Hz, 3H). <sup>13</sup>C NMR (125 MHz, CDCl<sub>3</sub>, ppm)  $\delta$ : 164.24, 164.04, 161.35, 145.70, 142.59, 139.13, 135.20, 132.24, 131.40, 131.25, 130.75, 130.53,

129.91, 128.70, 127.79, 127.03, 126.06, 125.99, 123.03, 122.11, 118.43, 114.97, 107.48, 69.74, 40.30, 30.22, 22.46, 20.39, 13.85, 10.47.

**NICN $\alpha$ -4C**, yellow solid, 79% yield.  $^1\text{H}$  NMR (500 MHz,  $\text{CDCl}_3$ , ppm)  $\delta$ : 8.66 – 8.61 (m, 2H), 8.25 (dd,  $J = 8.5, 1.0$  Hz, 1H), 7.95 – 7.90 (m, 2H), 7.85 – 7.81 (m, 2H), 7.71 (t,  $J = 7.5$  Hz, 2H), 7.60 – 7.56 (m, 3H), 7.01 – 6.96 (m, 2H), 4.20 (t,  $J = 8.0$  Hz, 2H), 4.04 (t,  $J = 6.5$  Hz, 2H), 1.84 – 1.70 (m, 4H), 1.56 – 1.42 (m, 4H), 1.02 – 0.96 (m, 6H).  $^{13}\text{C}$  NMR (125 MHz,  $\text{CDCl}_3$ , ppm)  $\delta$ : 164.17, 163.96, 161.32, 145.63, 142.53, 139.07, 135.14, 132.19, 131.36, 131.19, 130.69, 130.50, 129.84, 128.64, 127.75, 126.98, 126.00, 125.94, 122.97, 122.05, 118.39, 114.92, 107.40, 67.92, 40.25, 31.11, 30.18, 20.36, 19.17, 13.82, 13.79.

**NICN $\beta$ -1C**,  $^1\text{H}$  NMR (500 MHz,  $\text{CDCl}_3$ , ppm)  $\delta$ : 8.68 – 8.63 (m, 2H), 8.28 (d,  $J = 8.5$  Hz, 1H), 8.05 (d,  $J = 8.0$  Hz, 2H), 7.76 – 7.71 (m, 2H), 7.69 – 7.65 (m, 2H), 7.63 – 7.60 (m, 2H), 7.54 (s, 1H), 7.02 – 6.98 (m, 2H), 4.25 – 4.20 (m, 2H), 3.88 (s, 3H), 1.79 – 1.72 (m, 2H), 1.48 (h,  $J = 7.4$  Hz, 2H), 1.00 (t,  $J = 7.5$  Hz, 3H).  $^{13}\text{C}$  NMR (125 MHz,  $\text{CDCl}_3$ , ppm)  $\delta$ : 164.17, 163.96, 161.32, 145.63, 142.53, 139.07, 135.14, 132.19, 131.36, 131.19, 130.69, 130.50, 129.84, 128.64, 127.75, 126.98, 126.00, 125.94, 122.97, 122.05, 118.39, 114.92, 107.40, 67.92, 40.25, 31.11, 30.18, 20.36, 19.17, 13.82, 13.79.

**NICN $\beta$ -2C**,  $^1\text{H}$  NMR (500 MHz,  $\text{CDCl}_3$ , ppm)  $\delta$ : 8.65 (t,  $J = 6.5$  Hz, 2H), 8.27 (d,  $J = 8.5$  Hz, 1H), 8.03 (d,  $J = 8.0$  Hz, 2H), 7.76 – 7.70 (m, 2H), 7.65 (d,  $J = 8.0$  Hz, 2H), 7.60 (d,  $J = 7.5$  Hz, 2H), 7.52 (s, 1H), 6.98 (d,  $J = 8.5$  Hz, 2H), 4.21 (t,  $J = 8.0$  Hz, 2H), 4.10 (q,  $J = 7.0$  Hz, 2H), 1.79 – 1.71 (m, 2H), 1.51 – 1.42 (m, 5H), 0.99 (t,  $J = 7.5$  Hz, 3H).  $^{13}\text{C}$  NMR (125 MHz,  $\text{CDCl}_3$ , ppm)  $\delta$ : 164.20, 163.99, 160.09, 145.65, 140.40, 138.70, 134.21, 132.22, 131.24, 130.70, 130.41, 129.81, 129.26, 128.68, 127.78, 127.39, 127.06, 126.47, 123.02, 122.18, 118.04, 115.01, 112.36, 63.71, 40.28, 30.20, 20.37, 14.71, 13.83.

**NICN $\beta$ -3C**,  $^1\text{H}$  NMR (500 MHz,  $\text{CDCl}_3$ , ppm)  $\delta$ : 8.67 – 8.61 (m, 2H), 8.29 – 8.25 (m, 1H), 8.06 – 8.01 (m, 2H), 7.74 – 7.69 (m, 2H), 7.66 – 7.62 (m, 2H), 7.62 – 7.58 (m, 2H), 7.52 (s, 1H), 7.00 – 6.95 (m, 2H), 4.24 – 4.18 (m, 2H), 4.00 – 3.95 (m, 2H), 1.89 – 1.80 (m, 2H), 1.78 – 1.71 (m, 2H), 1.51 – 1.43 (, 2H), 1.06 (t,  $J = 7.5$  Hz, 3H), 0.99 (t,  $J = 7.5$  Hz, 3H).  $^{13}\text{C}$  NMR (125 MHz,  $\text{CDCl}_3$ , ppm)  $\delta$ : 164.16, 163.96, 160.28, 145.62, 140.36, 138.63, 134.20, 132.20, 131.21, 130.68, 130.39, 129.78, 129.24, 128.66, 127.76, 127.35, 127.04, 126.39, 123.00, 122.15, 118.03, 115.02, 112.34, 69.71, 40.26, 30.19, 22.48, 20.36, 13.82, 10.45.

**NICN $\beta$ -4C**,  $^1\text{H}$  NMR (500 MHz,  $\text{CDCl}_3$ , ppm)  $\delta$ : 8.67 – 8.62 (m, 2H), 8.27 (d,  $J = 8.5$  Hz, 1H), 8.04 (d,  $J = 8.0$  Hz, 2H), 7.75 – 7.70 (m, 2H), 7.67 – 7.63 (m, 2H), 7.60 (d,  $J = 8.0$  Hz, 2H), 7.52 (s, 1H), 7.00 – 6.96 (m, 2H), 4.22 (t,  $J = 7.5$  Hz, 2H), 4.03 (t,  $J = 6.5$  Hz, 2H), 1.84 – 1.71 (m, 4H), 1.56 – 1.43 (m, 4H), 1.02 – 0.97 (m, 6H).  $^{13}\text{C}$  NMR (125 MHz,  $\text{CDCl}_3$ , ppm)  $\delta$ : 164.21, 164.00, 160.32, 145.66, 140.40, 138.67, 134.23, 132.23, 131.25, 130.71, 130.42, 129.83, 129.26, 128.69, 127.79, 127.38, 127.06, 126.41, 123.03, 122.19, 118.06, 115.04, 112.39, 67.95, 40.29, 31.20, 30.21, 20.38, 19.20, 13.83, 13.81.

NICN $\beta$ -R (R = 1C, 2C, 3C and 4C) were synthesized with the similar method based on the previous report.<sup>1</sup>

### Data analyses

The lattice parameters are obtained via Pawley refinements of ADXRD patterns with the software of Material Studio. The IR modes are also calculated via this software. The Hirshfeld surface is calculated using the software CrystalExplorer.

The pressure-volume ( $P$ - $V$ ) data were fitted by the third-order Birch-Murnaghan (B-M) equation of state:

$$P(V) = \frac{3B_0}{2} \left[ \left( \frac{V_0}{V} \right)^{\frac{7}{3}} - \left( \frac{V_0}{V} \right)^{\frac{5}{3}} \right] \times \left\{ 1 + \frac{3}{4} (B_0' - 4) \left[ \left( \frac{V_0}{V} \right)^{\frac{2}{3}} - 1 \right] \right\}$$

where  $V_0$  is the zero-pressure volume,  $B_0$  is the bulk modulus, and  $B_0'$  is a parameter for the pressure derivative.

**Table S1.** The crystallographic data of NICN $\alpha$ -R (R = 1C, 2C, 3C and 4C).

| Identification                             | NICN $\alpha$ -1C                                | NICN $\alpha$ -2C                                | NICN $\alpha$ -3C                                             | NICN $\alpha$ -4C                                             |
|--------------------------------------------|--------------------------------------------------|--------------------------------------------------|---------------------------------------------------------------|---------------------------------------------------------------|
| Formula                                    | C <sub>32</sub> H <sub>26</sub> N <sub>2</sub> O | C <sub>33</sub> H <sub>28</sub> N <sub>2</sub> O | C <sub>34</sub> H <sub>30</sub> N <sub>2</sub> O <sub>3</sub> | C <sub>35</sub> H <sub>32</sub> N <sub>2</sub> O <sub>3</sub> |
| Formula weight                             | 486.55                                           | 500.57                                           | 514.60                                                        | 528.62                                                        |
| Temperature (K)                            | 293                                              | 293                                              | 293                                                           | 293                                                           |
| Wavelength (Å)                             | 1.54                                             | 1.54                                             | 1.54                                                          | 1.54                                                          |
| Crystal system                             | triclinic                                        | triclinic                                        | triclinic                                                     | triclinic                                                     |
| Space group                                | <i>P</i> -1                                      | <i>P</i> -1                                      | <i>P</i> -1                                                   | <i>P</i> -1                                                   |
| <i>a</i> (Å)                               | 9.26                                             | 9.21                                             | 6.83                                                          | 6.76                                                          |
| <i>b</i> (Å)                               | 10.86                                            | 12.09                                            | 14.39                                                         | 14.32                                                         |
| <i>c</i> (Å)                               | 12.87                                            | 12.62                                            | 15.09                                                         | 15.95                                                         |
| $\alpha$ (°)                               | 103.57                                           | 105.85                                           | 66.16                                                         | 116.10                                                        |
| $\beta$ (°)                                | 104.13                                           | 110.71                                           | 82.27                                                         | 90.86                                                         |
| $\gamma$ (°)                               | 97.04                                            | 91.75                                            | 84.89                                                         | 94.70                                                         |
| Volume                                     | 1198.64                                          | 1250.47                                          | 1343.68                                                       | 1379.78                                                       |
| <i>Z</i>                                   | 2                                                | 2                                                | 2                                                             | 2                                                             |
| Density (g/cm <sup>3</sup> )               | 1.35                                             | 1.33                                             | 1.27                                                          | 1.27                                                          |
| Absorption coefficient (mm <sup>-1</sup> ) | 0.69                                             | 0.68                                             | 0.65                                                          | 0.64                                                          |
| <i>F</i> (000)                             | 512                                              | 528                                              | 544                                                           | 560                                                           |
| _reflns_number_gt                          | 3856                                             | 3681                                             | 3641                                                          | 3910                                                          |

|                             |      |      |      |      |
|-----------------------------|------|------|------|------|
| <b>_reflns_number_total</b> | 4269 | 4540 | 4518 | 4624 |
| <b>R_factor_all</b>         | 0.05 | 0.06 | 0.06 | 0.05 |
| <b>wR_factor_ref</b>        | 0.12 | 0.13 | 0.16 | 0.12 |

**Table S2.** The detailed atomic positions in NICN $\alpha$ -1C.

| <b>Atom</b> | <b>x/a</b> | <b>y/b</b> | <b>z/c</b> |
|-------------|------------|------------|------------|
| O001        | 0.04       | -0.41      | 0.41       |
| O002        | -0.32      | -0.22      | 0.53       |
| O003        | 1.31       | 1.01       | 0.97       |
| N004        | -0.13      | -0.32      | 0.48       |
| C005        | 0.01       | -0.32      | 0.47       |
| C006        | 0.13       | -0.21      | 0.54       |
| C007        | 0.69       | 0.29       | 0.73       |
| H007        | 0.75       | 0.32       | 0.69       |
| C008        | 0.20       | 0.02       | 0.66       |
| C009        | 0.58       | 0.17       | 0.68       |
| H009        | 0.57       | 0.13       | 0.60       |
| C00A        | 0.09       | -0.10      | 0.60       |
| C00B        | 0.70       | 0.36       | 0.84       |
| C00C        | -0.06      | -0.10      | 0.60       |
| C00D        | 1.01       | 0.66       | 0.89       |
| C00E        | 0.15       | 0.13       | 0.72       |
| H00E        | 0.22       | 0.20       | 0.75       |
| N00F        | 0.76       | 0.60       | 1.08       |
| C00G        | 0.48       | 0.13       | 0.73       |
| C00H        | 0.91       | 0.54       | 0.85       |
| H00H        | 0.91       | 0.48       | 0.79       |
| C00I        | 0.80       | 0.48       | 0.89       |
| C00J        | 0.36       | 0.01       | 0.67       |
| C00K        | 0.50       | 0.19       | 0.84       |
| H00K        | 0.44       | 0.16       | 0.88       |
| C00L        | 0.39       | -0.10      | 0.61       |

|      |       |       |      |
|------|-------|-------|------|
| H00L | 0.49  | -0.10 | 0.62 |
| C00M | 0.60  | 0.30  | 0.90 |
| H00M | 0.61  | 0.35  | 0.97 |
| C00N | 0.78  | 0.55  | 1.00 |
| C00O | 0.28  | -0.21 | 0.55 |
| H00O | 0.31  | -0.28 | 0.51 |
| C00P | -0.18 | -0.21 | 0.54 |
| C00Q | 0.00  | 0.12  | 0.71 |
| H00Q | -0.03 | 0.20  | 0.74 |
| C00R | -0.11 | 0.01  | 0.65 |
| H00R | -0.21 | 0.01  | 0.65 |
| C00S | -0.25 | -0.44 | 0.43 |
| H00A | -0.32 | -0.45 | 0.47 |
| H00B | -0.20 | -0.51 | 0.42 |
| C00T | 1.21  | 0.90  | 0.95 |
| C00U | -0.34 | -0.44 | 0.31 |
| H00C | -0.27 | -0.43 | 0.27 |
| H00D | -0.39 | -0.37 | 0.31 |
| C00V | 1.19  | 0.81  | 0.85 |
| H00V | 1.25  | 0.83  | 0.80 |
| C00W | 1.09  | 0.69  | 0.82 |
| H00W | 1.08  | 0.63  | 0.75 |
| C00X | 1.12  | 0.87  | 1.02 |
| H00X | 1.13  | 0.94  | 1.08 |
| C00Y | 1.02  | 0.76  | 0.99 |
| H00Y | 0.97  | 0.74  | 1.04 |
| C00Z | -0.45 | -0.57 | 0.25 |
| H00F | -0.50 | -0.57 | 0.18 |
| H00G | -0.40 | -0.64 | 0.25 |
| C010 | -0.57 | -0.60 | 0.31 |
| H01A | -0.64 | -0.67 | 0.27 |
| H01B | -0.61 | -0.52 | 0.33 |
| H01C | -0.52 | -0.61 | 0.38 |

|      |      |      |      |
|------|------|------|------|
| C011 | 1.34 | 1.10 | 1.08 |
| H01D | 1.42 | 1.17 | 1.08 |
| H01E | 1.37 | 1.06 | 1.13 |
| H01F | 1.25 | 1.13 | 1.08 |

**Table S3.** The detailed atomic positions in NICN $\alpha$ -2C.

| Atom | x/a   | y/b   | z/c  |
|------|-------|-------|------|
| O001 | 0.09  | -0.37 | 0.45 |
| O002 | -0.28 | -0.19 | 0.57 |
| O003 | 1.24  | 0.96  | 0.96 |
| N004 | -0.09 | -0.28 | 0.52 |
| C005 | 0.17  | -0.17 | 0.57 |
| C006 | 0.11  | -0.07 | 0.62 |
| C007 | -0.04 | -0.07 | 0.62 |
| C008 | 0.49  | 0.15  | 0.73 |
| C009 | 0.57  | 0.19  | 0.67 |
| H009 | 0.56  | 0.14  | 0.60 |
| C00A | 0.69  | 0.36  | 0.84 |
| C00B | -0.15 | -0.18 | 0.57 |
| C00C | 0.67  | 0.29  | 0.72 |
| H00C | 0.73  | 0.31  | 0.68 |
| C00D | 0.15  | 0.14  | 0.71 |
| H00D | 0.22  | 0.21  | 0.74 |
| C00E | 0.97  | 0.64  | 0.88 |
| C00F | 0.06  | -0.28 | 0.51 |
| C00G | 0.79  | 0.48  | 0.89 |
| C00H | 0.22  | 0.04  | 0.67 |
| C00I | -0.09 | 0.03  | 0.66 |
| H00I | -0.20 | 0.03  | 0.66 |
| C00J | 0.32  | -0.16 | 0.57 |
| H00J | 0.35  | -0.23 | 0.54 |
| N00K | 0.76  | 0.60  | 1.08 |

|      |       |       |      |
|------|-------|-------|------|
| C00L | 1.15  | 0.85  | 0.94 |
| C00M | 0.00  | 0.14  | 0.71 |
| H00M | -0.04 | 0.20  | 0.74 |
| C00N | 0.37  | 0.04  | 0.68 |
| C00O | 0.88  | 0.52  | 0.84 |
| H00O | 0.88  | 0.47  | 0.77 |
| C00P | -0.19 | -0.39 | 0.47 |
| H00A | -0.26 | -0.39 | 0.52 |
| H00B | -0.13 | -0.46 | 0.49 |
| C00Q | 0.51  | 0.22  | 0.85 |
| H00Q | 0.46  | 0.20  | 0.89 |
| C00R | 0.42  | -0.06 | 0.63 |
| H00R | 0.52  | -0.06 | 0.63 |
| C00S | 0.61  | 0.33  | 0.90 |
| H00S | 0.63  | 0.37  | 0.97 |
| C00T | 1.14  | 0.77  | 0.84 |
| H00T | 1.18  | 0.78  | 0.79 |
| C00U | 0.78  | 0.55  | 1.00 |
| C00V | 0.99  | 0.73  | 0.98 |
| H00V | 0.94  | 0.72  | 1.03 |
| C00W | -0.29 | -0.42 | 0.34 |
| H00E | -0.22 | -0.42 | 0.30 |
| H00F | -0.36 | -0.37 | 0.33 |
| C00X | 1.05  | 0.66  | 0.81 |
| H00X | 1.04  | 0.60  | 0.74 |
| C00Y | 1.08  | 0.83  | 1.01 |
| H00Y | 1.09  | 0.89  | 1.08 |
| C00Z | -0.39 | -0.54 | 0.29 |
| H00G | -0.45 | -0.56 | 0.21 |
| H00H | -0.31 | -0.60 | 0.30 |
| C010 | -0.50 | -0.56 | 0.35 |
| H01A | -0.56 | -0.64 | 0.31 |
| H01B | -0.56 | -0.50 | 0.36 |



|      |       |       |      |
|------|-------|-------|------|
| H01C | -0.43 | -0.57 | 0.43 |
| C011 | 1.29  | 1.04  | 1.08 |
| H01D | 1.34  | 1.00  | 1.14 |
| H01E | 1.19  | 1.07  | 1.09 |
| C012 | 1.40  | 1.14  | 1.08 |
| H01F | 1.34  | 1.18  | 1.03 |
| H01G | 1.48  | 1.11  | 1.07 |
| H01H | 1.43  | 1.19  | 1.16 |

**Table S4.** The detailed atomic positions in NICN $\alpha$ -3C.

| Atom | x/a  | y/b  | z/c   |
|------|------|------|-------|
| O001 | 0.25 | 0.40 | 1.05  |
| O002 | 0.21 | 1.15 | -0.20 |
| O003 | 0.34 | 0.84 | -0.20 |
| N004 | 0.27 | 0.99 | -0.20 |
| C005 | 0.25 | 1.02 | -0.04 |
| C006 | 0.28 | 0.87 | 0.11  |
| C007 | 0.22 | 0.44 | 0.95  |
| C008 | 0.28 | 0.91 | 0.01  |
| C009 | 0.21 | 0.52 | 0.75  |
| C00A | 0.22 | 1.08 | 0.01  |
| H00A | 0.20 | 1.15 | -0.03 |
| C00B | 0.32 | 0.85 | -0.04 |
| N00C | 0.72 | 0.58 | 0.62  |
| C00D | 0.34 | 0.63 | 0.47  |
| C00E | 0.34 | 0.56 | 0.80  |
| H00E | 0.42 | 0.61 | 0.76  |
| C00F | 0.33 | 0.72 | 0.27  |
| C00G | 0.20 | 0.56 | 0.65  |
| H00G | 0.08 | 0.56 | 0.63  |
| C00H | 0.25 | 0.94 | 0.16  |
| H00H | 0.25 | 0.91 | 0.23  |

|      |       |      |       |
|------|-------|------|-------|
| C00I | 0.36  | 0.59 | 0.58  |
| C00J | 0.51  | 0.64 | 0.41  |
| H00J | 0.63  | 0.62 | 0.43  |
| C00K | 0.34  | 0.52 | 0.89  |
| H00K | 0.43  | 0.55 | 0.92  |
| C00L | 0.32  | 0.76 | 0.16  |
| C00M | 0.50  | 0.68 | 0.31  |
| H00M | 0.62  | 0.68 | 0.27  |
| C00N | 0.24  | 1.06 | -0.15 |
| C00O | 0.16  | 0.67 | 0.43  |
| H00O | 0.05  | 0.67 | 0.47  |
| C00P | 0.09  | 0.45 | 0.81  |
| H00P | 0.00  | 0.42 | 0.79  |
| C00Q | 0.09  | 0.40 | 0.91  |
| H00Q | 0.01  | 0.35 | 0.95  |
| C00R | 0.31  | 0.89 | -0.15 |
| C00S | 0.36  | 0.74 | 0.01  |
| H00S | 0.39  | 0.70 | -0.03 |
| C00T | 0.16  | 0.71 | 0.33  |
| H00T | 0.03  | 0.74 | 0.31  |
| C00U | 0.22  | 1.04 | 0.11  |
| H00U | 0.20  | 1.08 | 0.14  |
| C00V | 0.37  | 0.70 | 0.11  |
| H00V | 0.40  | 0.64 | 0.14  |
| C00W | 0.56  | 0.59 | 0.60  |
| C00X | 0.13  | 0.32 | 1.12  |
| H00B | 0.16  | 0.26 | 1.10  |
| H00C | -0.01 | 0.34 | 1.12  |
| C00Y | 0.20  | 0.29 | 1.22  |
| H00D | 0.18  | 0.35 | 1.23  |
| H00F | 0.34  | 0.27 | 1.22  |
| C00Z | 0.25  | 1.03 | -0.30 |
| H00I | 0.15  | 1.09 | -0.32 |

|      |       |      |       |
|------|-------|------|-------|
| H00L | 0.20  | 0.98 | -0.32 |
| C010 | 0.44  | 1.07 | -0.37 |
| H01A | 0.49  | 1.12 | -0.35 |
| H01B | 0.54  | 1.02 | -0.36 |
| C011 | 0.08  | 0.21 | 1.30  |
| H01C | 0.12  | 0.15 | 1.29  |
| H01D | -0.06 | 0.22 | 1.29  |
| H01E | 0.11  | 0.20 | 1.36  |
| C012 | 0.41  | 1.12 | -0.47 |
| H01F | 0.33  | 1.19 | -0.48 |
| H01G | 0.34  | 1.08 | -0.49 |
| C013 | 0.60  | 1.15 | -0.54 |
| H01H | 0.57  | 1.17 | -0.61 |
| H01I | 0.69  | 1.09 | -0.53 |
| H01J | 0.67  | 1.20 | -0.53 |

**Table S5.** The detailed atomic positions in NICN $\alpha$ -4C.

| Atom | x/a  | y/b  | z/c   |
|------|------|------|-------|
| O001 | 0.24 | 0.05 | -0.02 |
| O002 | 0.22 | 0.56 | 1.20  |
| O003 | 0.37 | 0.85 | 1.17  |
| N004 | 0.28 | 0.70 | 1.18  |
| C005 | 0.28 | 0.52 | 0.89  |
| C006 | 0.24 | 0.41 | 0.85  |
| H006 | 0.24 | 0.37 | 0.79  |
| N007 | 0.73 | 0.30 | 0.38  |
| C008 | 0.37 | 0.33 | 0.43  |
| C009 | 0.22 | 0.23 | 0.27  |
| C00A | 0.25 | 0.53 | 1.05  |
| C00B | 0.33 | 0.69 | 1.03  |
| C00C | 0.28 | 0.58 | 0.99  |
| C00D | 0.37 | 0.68 | 0.87  |

|      |      |      |       |
|------|------|------|-------|
| H00D | 0.40 | 0.71 | 0.84  |
| C00E | 0.21 | 0.30 | 0.37  |
| H00E | 0.09 | 0.32 | 0.39  |
| C00F | 0.34 | 0.09 | 0.13  |
| H00F | 0.42 | 0.04 | 0.11  |
| C00G | 0.33 | 0.51 | 0.73  |
| C00H | 0.37 | 0.74 | 0.97  |
| H00H | 0.40 | 0.81 | 1.00  |
| C00I | 0.35 | 0.40 | 0.53  |
| C00J | 0.25 | 0.60 | 1.15  |
| C00K | 0.52 | 0.45 | 0.59  |
| H00K | 0.64 | 0.45 | 0.56  |
| C00L | 0.51 | 0.51 | 0.69  |
| H00L | 0.62 | 0.55 | 0.72  |
| C00M | 0.32 | 0.57 | 0.83  |
| C00N | 0.33 | 0.76 | 1.13  |
| C00O | 0.17 | 0.40 | 0.57  |
| H00O | 0.05 | 0.37 | 0.54  |
| C00P | 0.22 | 0.11 | 0.07  |
| C00Q | 0.22 | 0.43 | 1.01  |
| H00Q | 0.20 | 0.39 | 1.05  |
| C00R | 0.21 | 0.37 | 0.91  |
| H00R | 0.19 | 0.29 | 0.88  |
| C00S | 0.16 | 0.46 | 0.67  |
| H00S | 0.03 | 0.46 | 0.70  |
| C00T | 0.34 | 0.15 | 0.23  |
| H00T | 0.42 | 0.14 | 0.26  |
| C00U | 0.10 | 0.19 | 0.11  |
| H00U | 0.02 | 0.21 | 0.07  |
| C00V | 0.09 | 0.25 | 0.20  |
| H00V | 0.01 | 0.30 | 0.23  |
| C00W | 0.56 | 0.31 | 0.40  |
| C00X | 0.13 | 0.08 | -0.09 |

|      |       |       |       |
|------|-------|-------|-------|
| H00A | 0.17  | 0.15  | -0.07 |
| H00B | -0.01 | 0.07  | -0.08 |
| C00Y | 0.18  | 0.01  | -0.19 |
| H00C | 0.15  | -0.06 | -0.20 |
| H00G | 0.32  | 0.02  | -0.19 |
| C00Z | 0.08  | 0.03  | -0.26 |
| H00I | -0.06 | 0.02  | -0.26 |
| H00J | 0.11  | 0.10  | -0.25 |
| C010 | 0.47  | 0.78  | 1.34  |
| H01A | 0.57  | 0.82  | 1.32  |
| H01B | 0.52  | 0.71  | 1.32  |
| C011 | 0.27  | 0.77  | 1.29  |
| H01C | 0.17  | 0.73  | 1.31  |
| H01D | 0.23  | 0.83  | 1.30  |
| C012 | 0.46  | 0.84  | 1.44  |
| H01E | 0.39  | 0.91  | 1.46  |
| H01F | 0.37  | 0.80  | 1.47  |
| C013 | 0.13  | -0.04 | -0.36 |
| H01G | 0.07  | -0.02 | -0.40 |
| H01H | 0.10  | -0.11 | -0.37 |
| H01I | 0.28  | -0.03 | -0.36 |
| C014 | 0.66  | 0.87  | 1.50  |
| H01J | 0.74  | 0.92  | 1.48  |
| H01K | 0.72  | 0.81  | 1.48  |
| H01L | 0.64  | 0.91  | 1.56  |

**Table S6.** The torsion angles between NI and CN $\alpha$  units and the angles between the two benzenic rings within the CN $\alpha$  units for NICN $\alpha$ -R.

| <b>Torsion angles</b>                   | <b>NICN<math>\alpha</math>-1C</b> | <b>NICN<math>\alpha</math>-2C</b> | <b>NICN<math>\alpha</math>-3C</b> | <b>NICN<math>\alpha</math>-4C</b> |
|-----------------------------------------|-----------------------------------|-----------------------------------|-----------------------------------|-----------------------------------|
| <b>Between NI-CN<math>\alpha</math></b> | 51.4°                             | 49.9°                             | 68.7°                             | 67.8°                             |
| <b>Within CN<math>\alpha</math></b>     | 10.6°                             | 8.6°                              | 54.7°                             | 56.4°                             |

**Table S7.** Comparisons of the pressure-induced emission shifts in typical PCMs.

| Compound                                                                                    | Shift range (nm) | Pressure range (GPa) | Pressure coefficients (nm/GPa) | Refs. |
|---------------------------------------------------------------------------------------------|------------------|----------------------|--------------------------------|-------|
| 1,4-Bis[(4-methoxyphenyl)-1,3,4-oxadiazolyl]-2,5-bisheptyloxyphenylene                      | 57               | 9.6                  | 5.9                            | [2]   |
| Tetraphenylethene                                                                           | 40               | 10                   | 4.0                            | [3]   |
| Benzothiazole-enamido boron difluoride complexes                                            | 113              | 10.8                 | 10.5                           | [4]   |
| Benzothiazole-enamido boron difluoride complexes                                            | 125              | 10.34                | 12.1                           | [4]   |
| Triphenylacrylonitrile derivative/(TPAN-MeO-BCrys)                                          | 82               | 10.2                 | 8.0                            | [5]   |
| Triphenylacrylonitrile derivative/(TPAN-MeO-SCrys)                                          | 56               | 12.3                 | 4.6                            | [5]   |
| Spiropyrans-pyrene/(SP-Pyr)                                                                 | 100              | 11.1                 | 9.0                            | [6]   |
| Cyano-substituted oligo( <i>p</i> -phenylene vinylene)derivatives / (mF-TPA)                | 146              | 10.1                 | 14.5                           | [7]   |
| 4-(2-(4'-(Diphenylamino)-[1,1'-biphenyl]-4-yl)-1Hphenanthro[9,10-d]imidazol-1-yl)benzotrile | 130              | 13.2                 | 9.9                            | [8]   |
| Pyrene-rhodamine B / (PyB)                                                                  | 130              | 9.0                  | 14.5                           | [9]   |
| 2,6-di(triphenylamine)-4-carbonitrile                                                       | 113              | 9.9                  | 11.4                           | [10]  |
| Truxene                                                                                     | 120              | 11.8                 | 10.2                           | [11]  |
| 9-(1,2,2-triphenylvinyl)anthracene                                                          | 83               | 12.9                 | 6.4                            | [12]  |
| 9-(4-(1,2,2-triphenylvinyl)phenyl)anthracene                                                | 104              | 12.5                 | 8.3                            | [12]  |

**Table S8.** The torsion angles between NI and CN $\beta$  units and the angles between the two benzenic rings within the CN $\beta$  units for NICN $\beta$ -R. There are slight differences between our results and the previous reports, which should be raised from the different measurement methods.

| <b>Torsion angles</b>                  | <b>NICN<math>\beta</math>-1C</b> | <b>NICN<math>\beta</math>-2C</b> | <b>NICN<math>\beta</math>-3C</b> | <b>NICN<math>\beta</math>-4C</b> |
|----------------------------------------|----------------------------------|----------------------------------|----------------------------------|----------------------------------|
| <b>Between NI-CN<math>\beta</math></b> | 60.9                             | 39.5                             | 61.4                             | 62.8                             |
| <b>Within CN<math>\beta</math></b>     | 8.7                              | 10.1                             | 49.1                             | 51.2                             |

**Table S9.** The emission ( $\lambda_{em}$ ) and absorption ( $\lambda_{abs}$ ) wavelength, as well as the Stokes shifts ( $\Delta\lambda$ ) of NICN $\beta$ -R at 1 atm and at  $\approx 10$  GPa.  $\lambda_{abs}$  represents the wavelength of absorption edge. The Stokes shifts at 1 atm and high pressure are estimated based on the  $\lambda_{em}$  and  $\lambda_{abs}$ .

|                                  | $\lambda_{em}$<br>(1 atm) | $\lambda_{abs}$<br>(1 atm) | $\Delta\lambda$<br>(1 atm) | $\lambda_{em}$<br>( $\approx 10$ GPa) | $\lambda_{abs}$<br>( $\approx 10$ GPa) | $\Delta\lambda$<br>( $\approx 10$ GPa) |
|----------------------------------|---------------------------|----------------------------|----------------------------|---------------------------------------|----------------------------------------|----------------------------------------|
| <b>NICN<math>\beta</math>-1C</b> | 499.2 nm                  | 473.5 nm                   | 25.7 nm                    | 691.0 nm                              | 684.8 nm                               | 6.2 nm                                 |
| <b>NICN<math>\beta</math>-2C</b> | 546.5 nm                  | 509.3 nm                   | 37.2 nm                    | 751.3 nm                              | 651.2 nm                               | 100.1 nm                               |
| <b>NICN<math>\beta</math>-3C</b> | 489.1 nm                  | 467.9 nm                   | 21.2 nm                    | 685.4 nm                              | 642.4 nm                               | 43.0 nm                                |
| <b>NICN<math>\beta</math>-4C</b> | 496.1 nm                  | 463.9 nm                   | 32.2 nm                    | 675.0 nm                              | 593.7 nm                               | 81.3 nm                                |

# NMR Spectra of NICN $\beta$ -R (R = 1C, 2C, 3C and 4C)

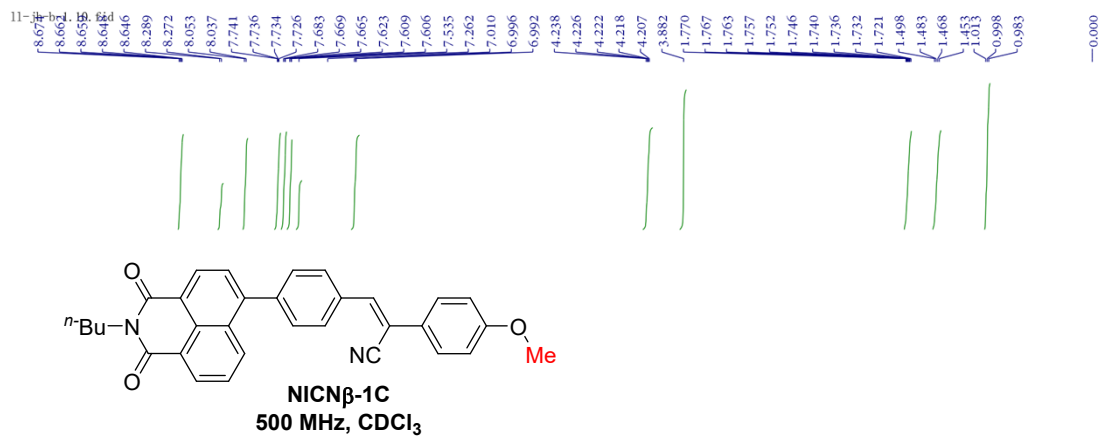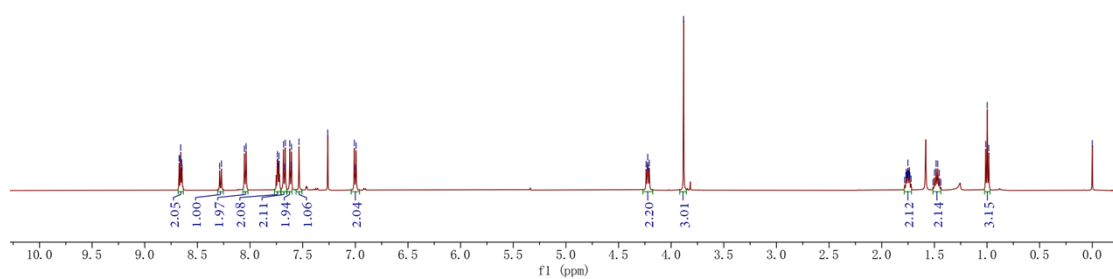



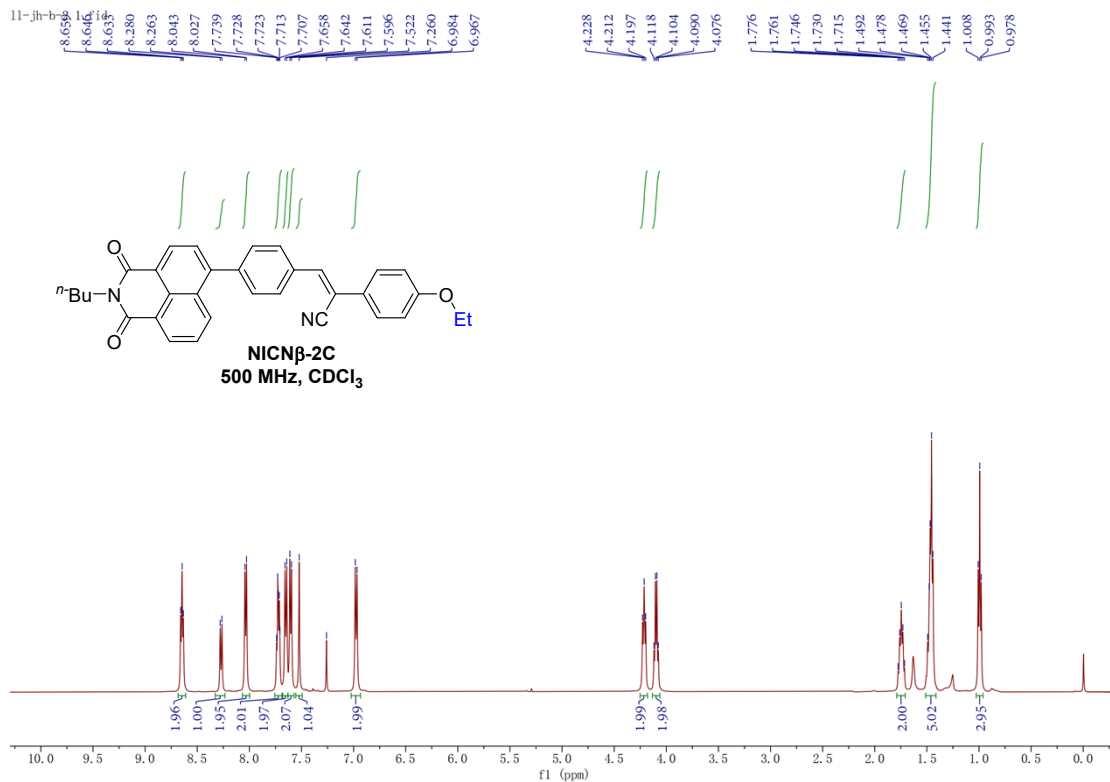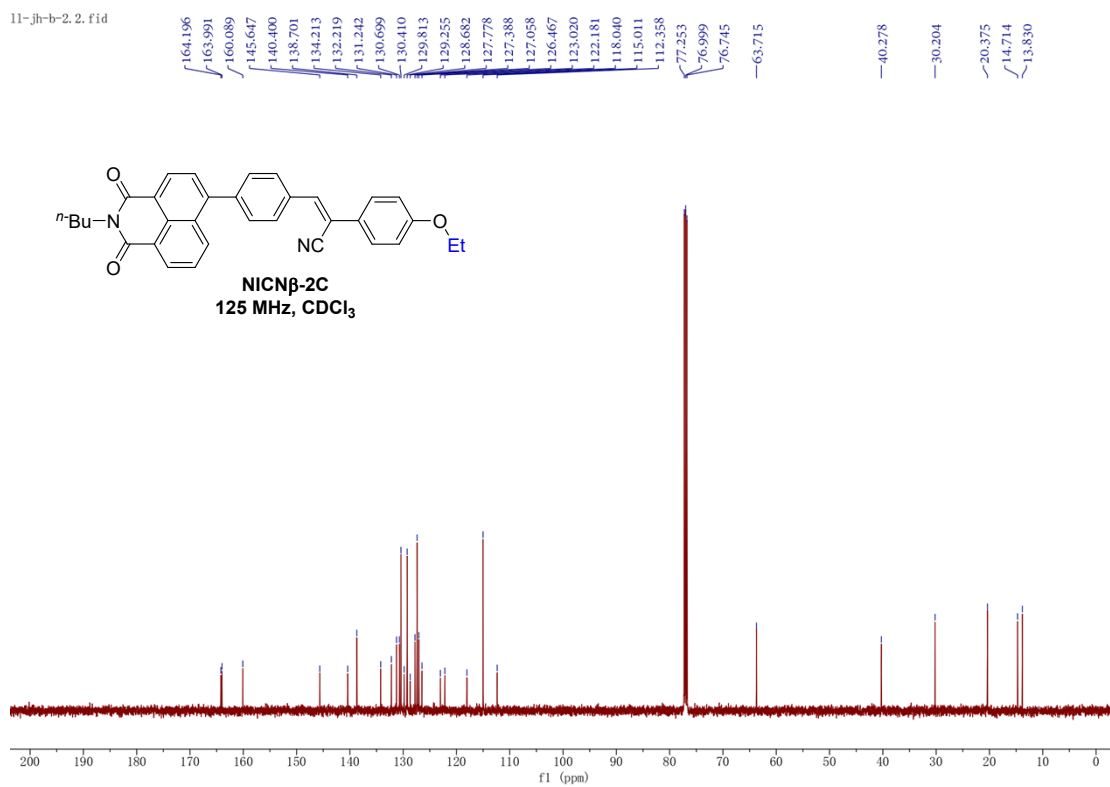

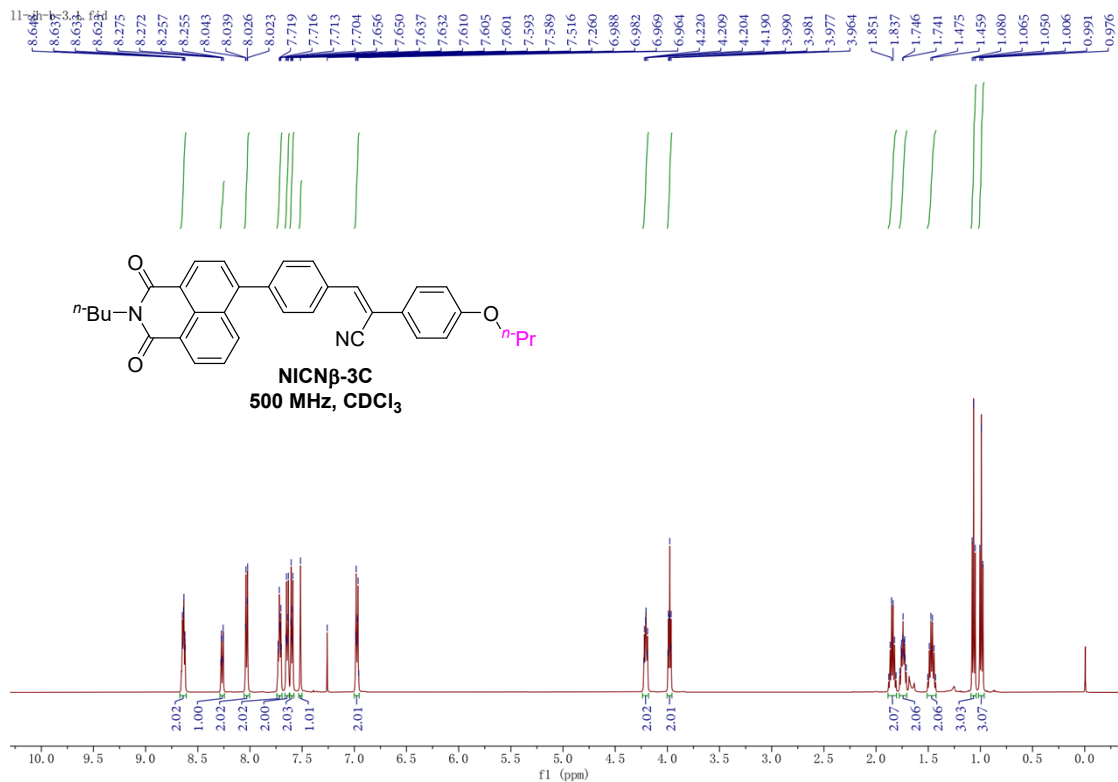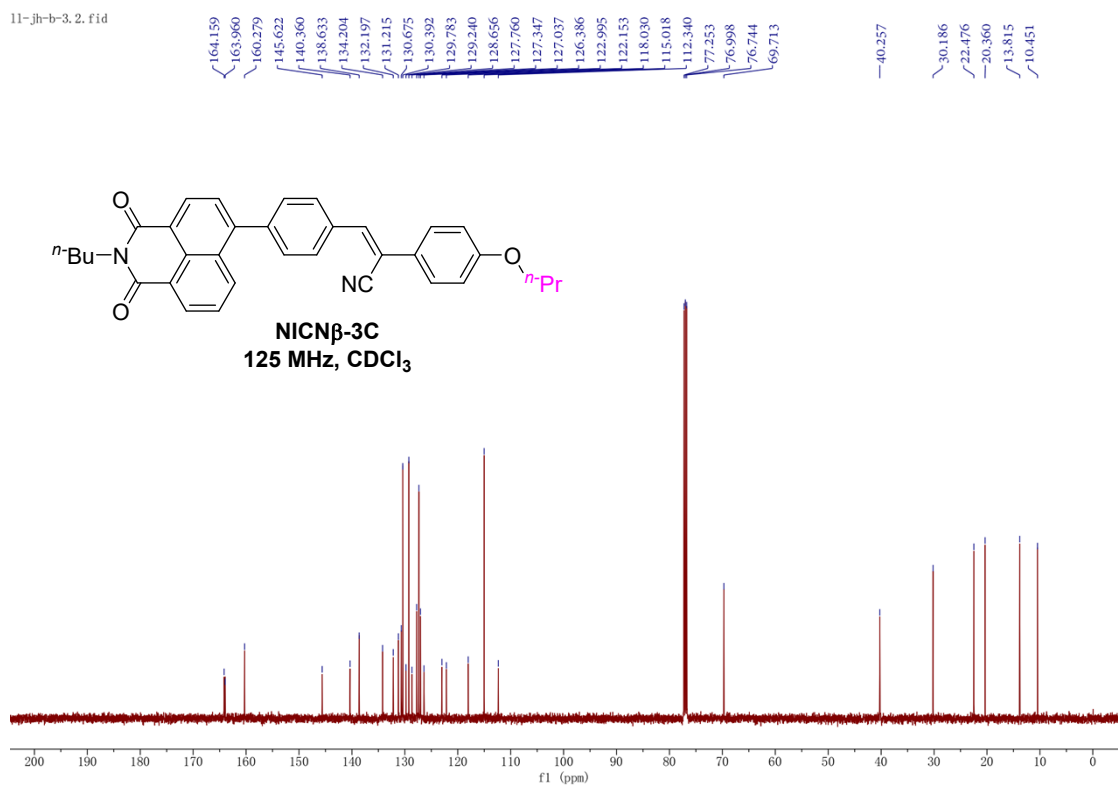

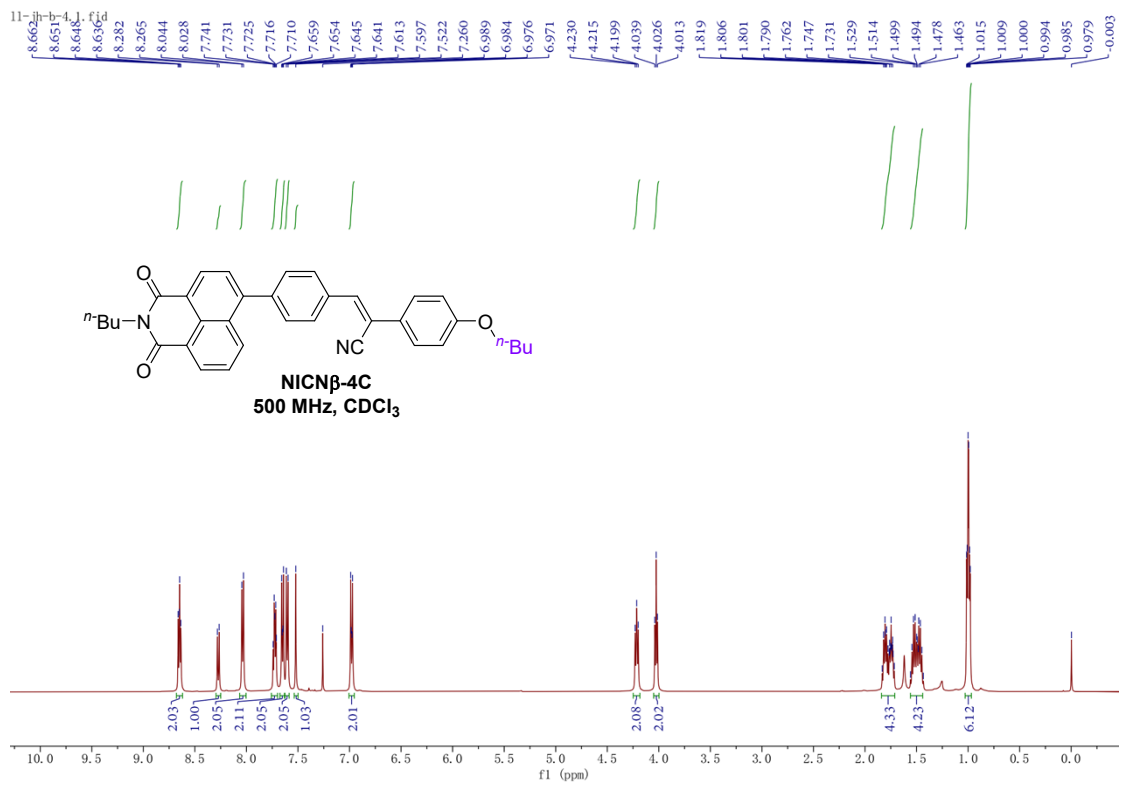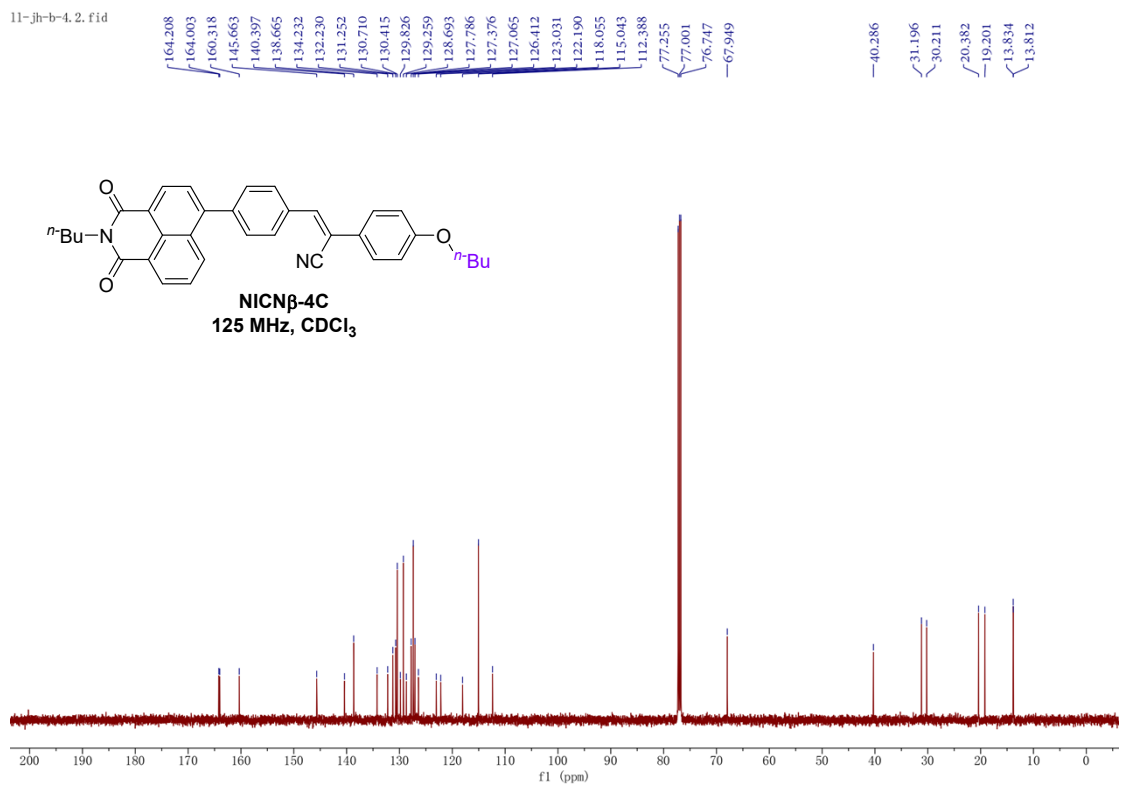

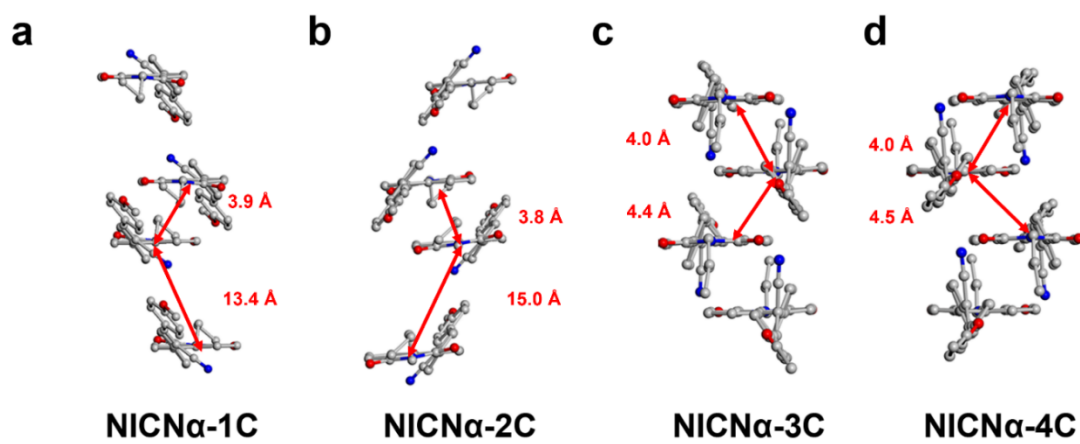

**Figure S1.** The crystalline structures and interlayer distances (the center distances between NI moieties) of NICN $\alpha$ -1C, NICN $\alpha$ -2C, NICN $\alpha$ -3C and NICN $\alpha$ -4C.

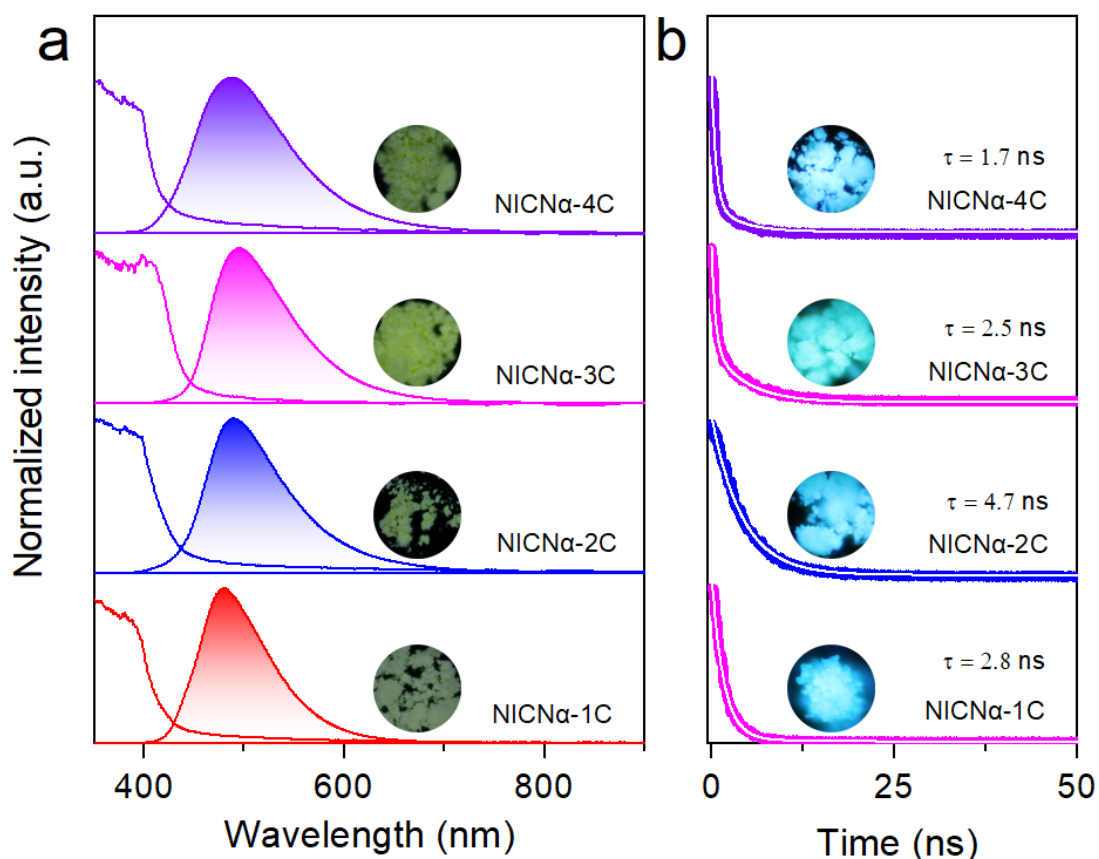

**Figure S2.** (a) The ambient PL emission and absorption spectra of NICN $\alpha$ -R (R = 1C, 2C, 3C and 4C). The insets illustrate the optical micrographs of corresponding sample. (b) The PL lifetime measurements of NICN $\alpha$ -R (R = 1C, 2C, 3C and 4C). The insets exhibit the PL micrographs of corresponding sample.

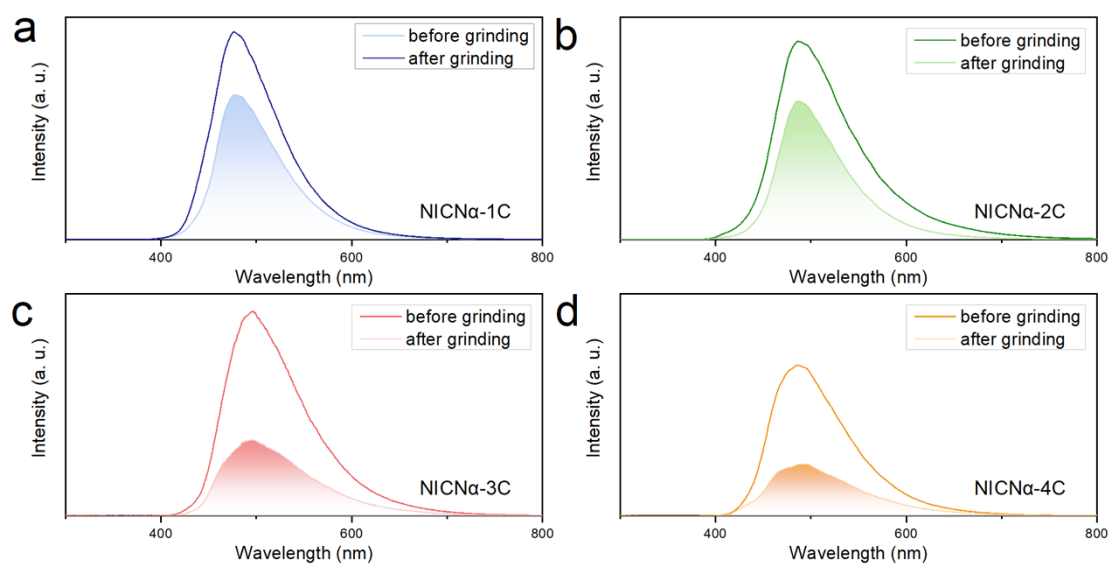

**Figure S3.** The comparisons of the emission spectra of (a) NICN $\alpha$ -1C, (b) NICN $\alpha$ -2C, (c) NICN $\alpha$ -3C and (d) NICN $\alpha$ -4C before and after grinding.

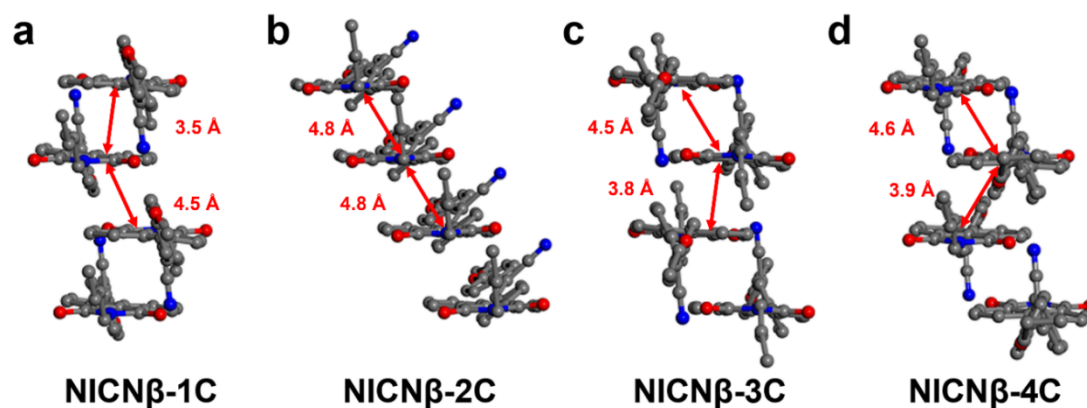

**Figure S4.** The crystalline structures and interlayer distances (the center distances between NI moieties) of NICN $\beta$ -1C, NICN $\beta$ -2C, NICN $\beta$ -3C and NICN $\beta$ -4C.

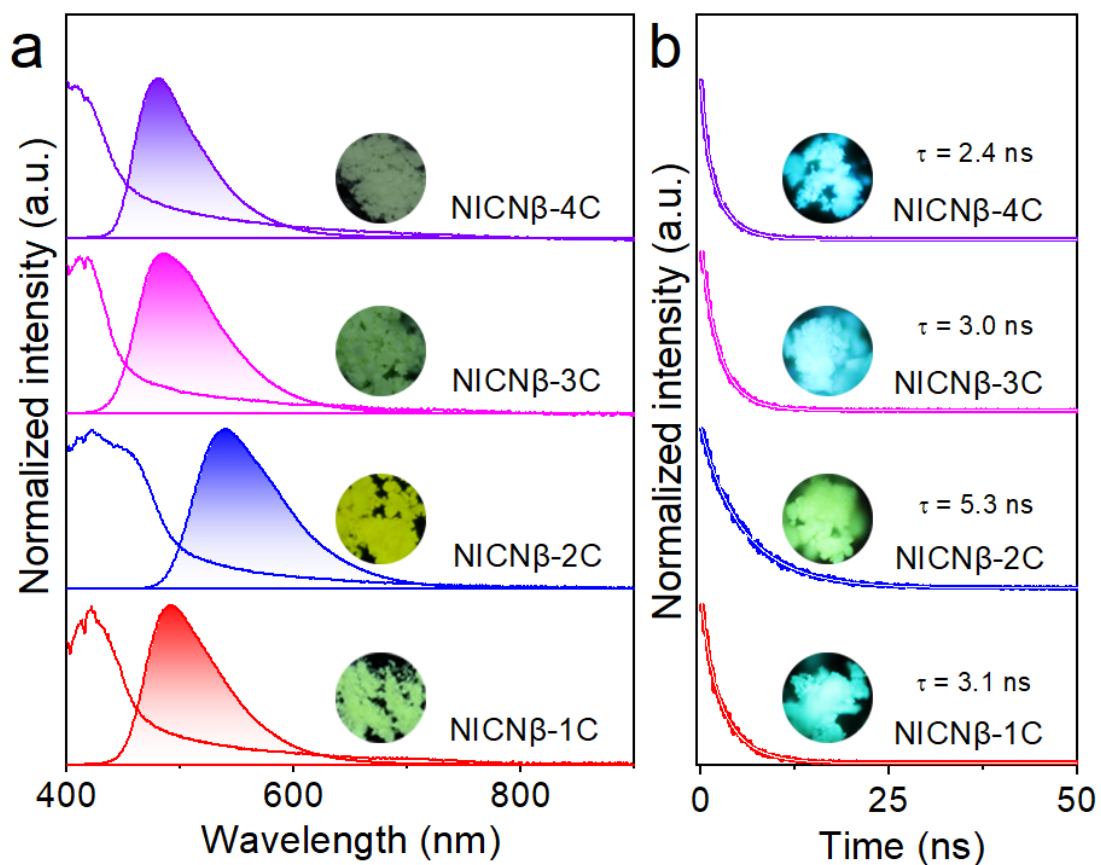

**Figure S5.** (a) The PL emission and absorption spectra of NICN $\beta$ -R (R = 1C, 2C, 3C and 4C) at ambient conditions. The insets illustrate the optical micrographs of corresponding sample. (b) The PL decay curves of NICN $\beta$ -R (R = 1C, 2C, 3C and 4C). The insets exhibit the PL micrographs of corresponding sample.

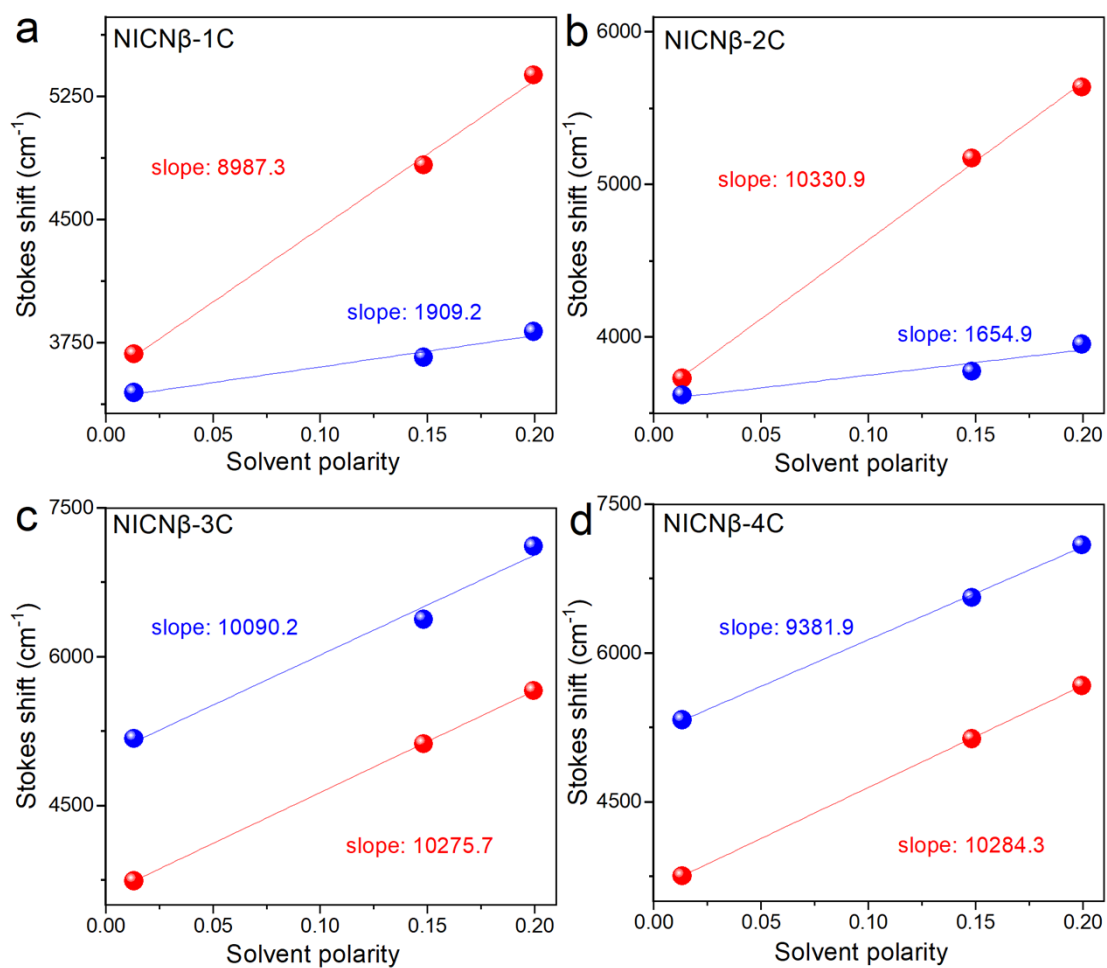

**Figure S6.** The Stokes shifts of (a) NICNβ-1C, (b) NICNβ-2C, (c) NICNβ-3C and (d) NICNβ-4C in different solvents.



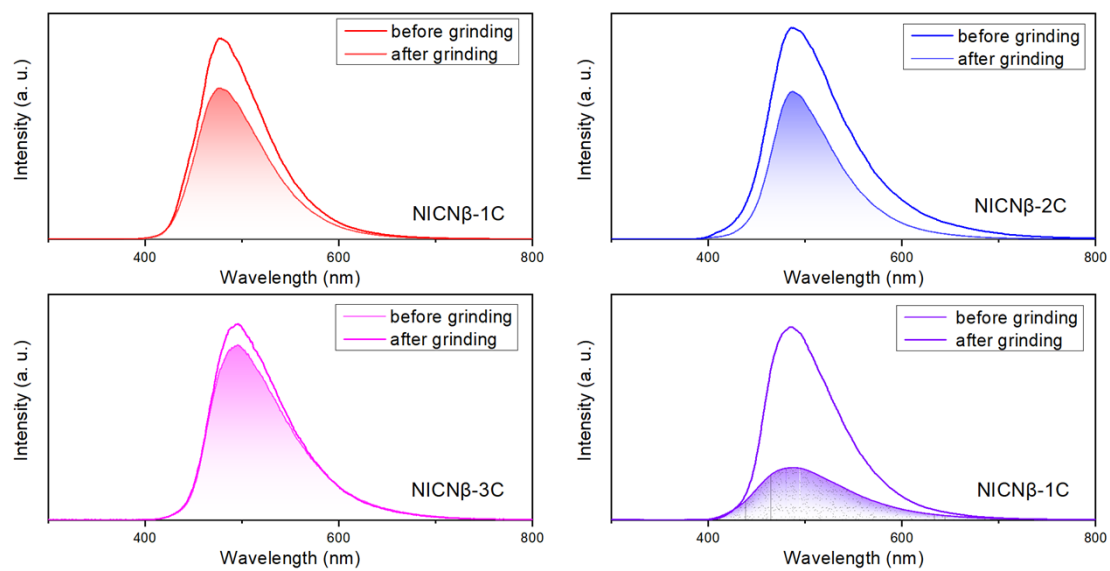

**Figure S7.** The PL emission spectra of (a) NICNβ-1C, (b) NICNβ-2C, (c) NICNβ-3C and (d) NICNβ-4C before and after grinding.

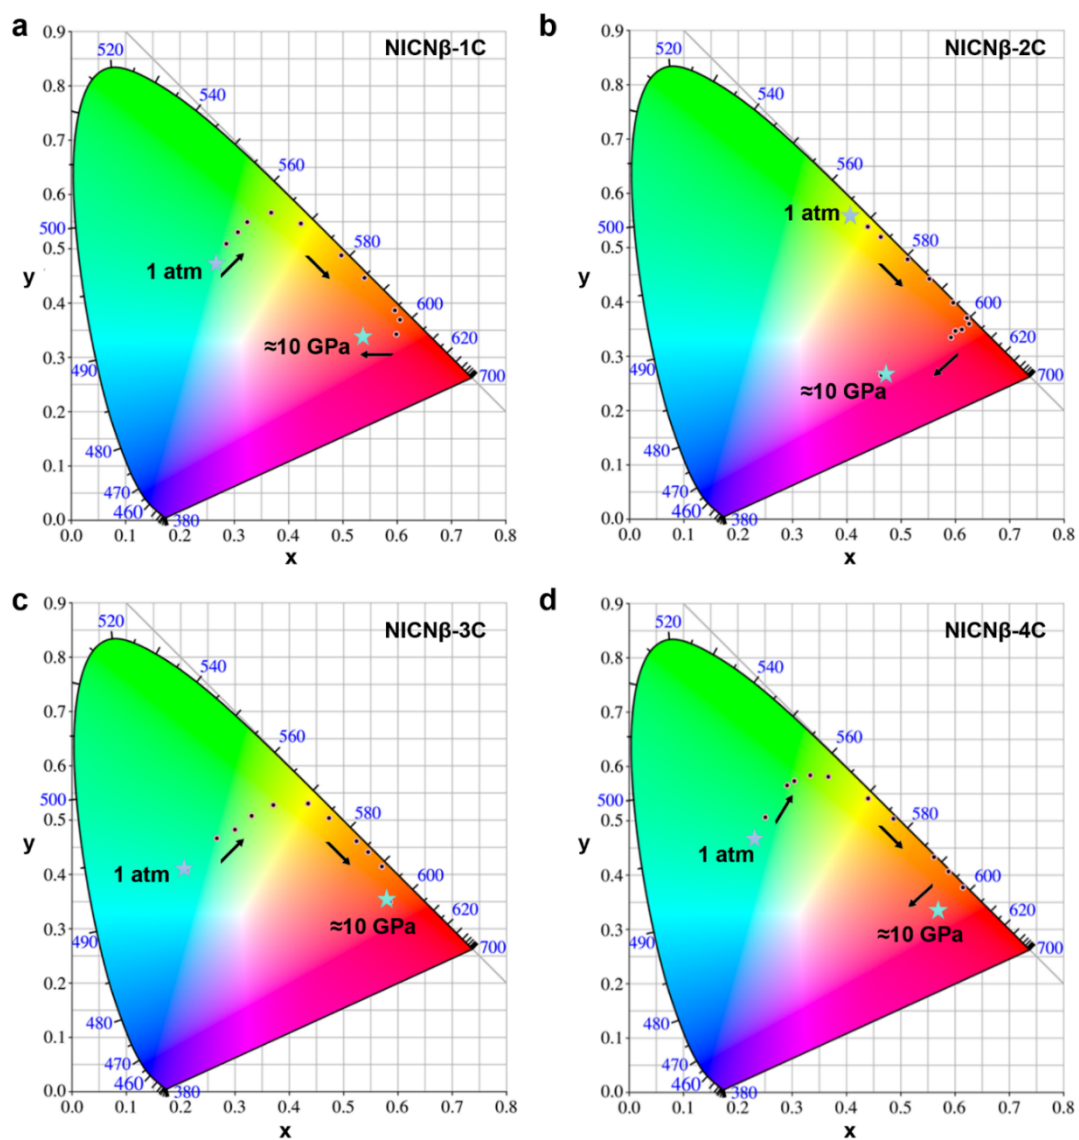

**Figure S8.** The pressure-dependent CIE chromaticity coordinate of (a) NICNβ-1C, (b) NICNβ-2C, (c) NICNβ-3C and (d) NICNβ-4C.

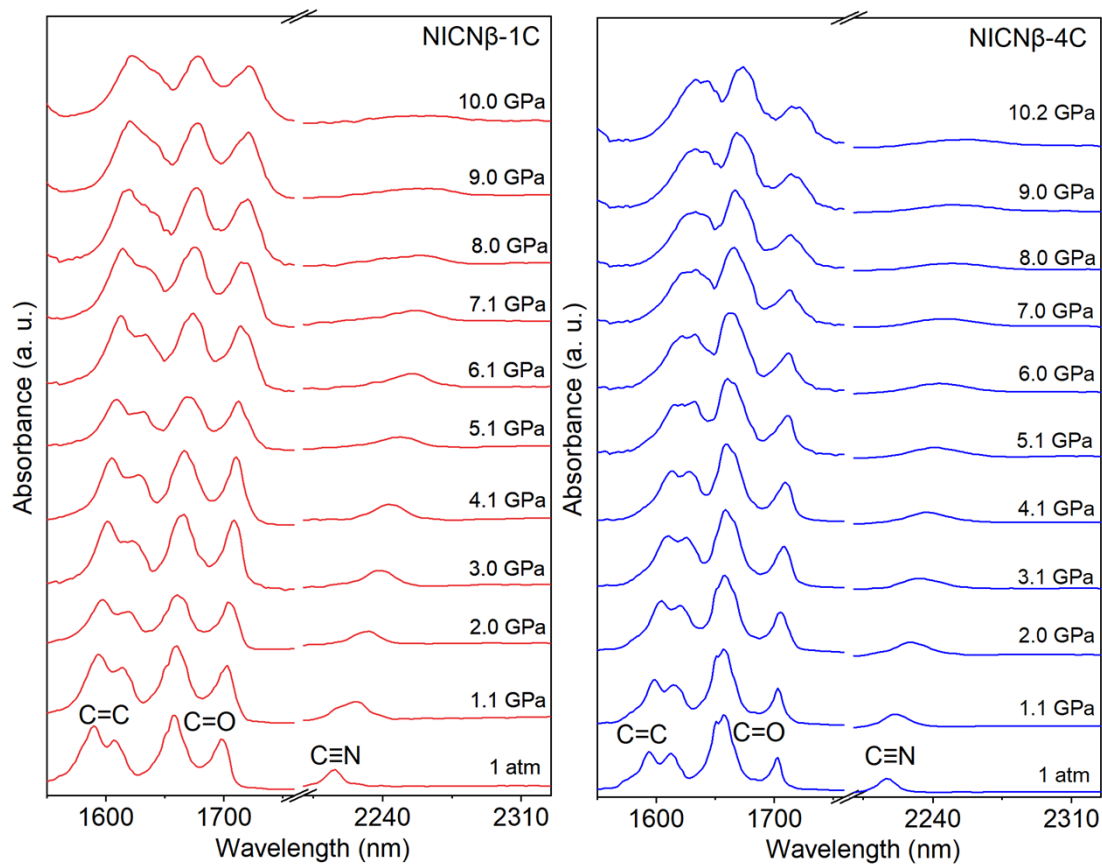

**Figure S9.** Selected IR spectra of (a) NICN $\beta$ -1C and (b) NICN $\beta$ -4C with increasing pressure to  $\approx 10$  GPa.

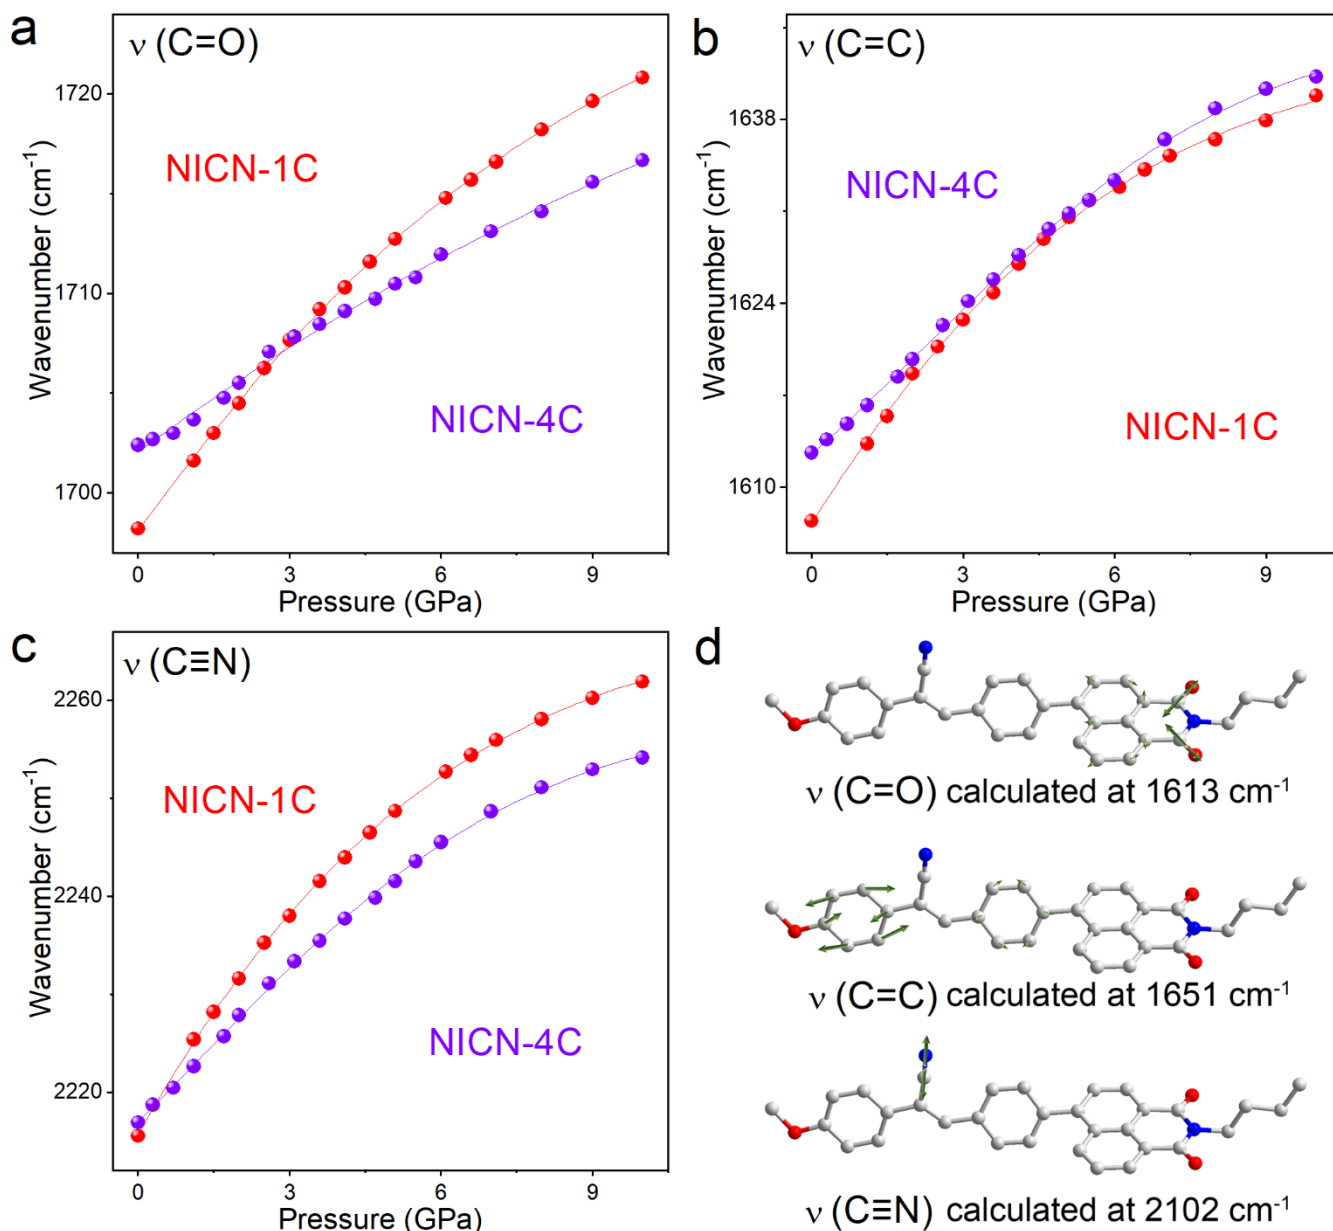

**Figure S10.** Comparisons of the wavenumbers of selected IR modes of (a) C=O, (b) C=C and (c) C≡N at high pressure. (d) The illustration of corresponding vibration modes.

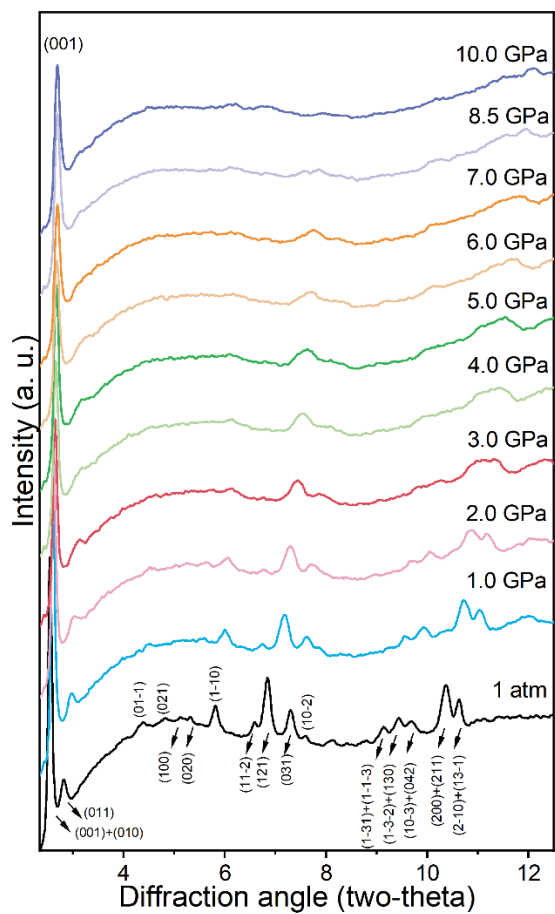

**Figure S11.** The ADXR D patterns of NICCS $\beta$ -4C with increasing pressure.

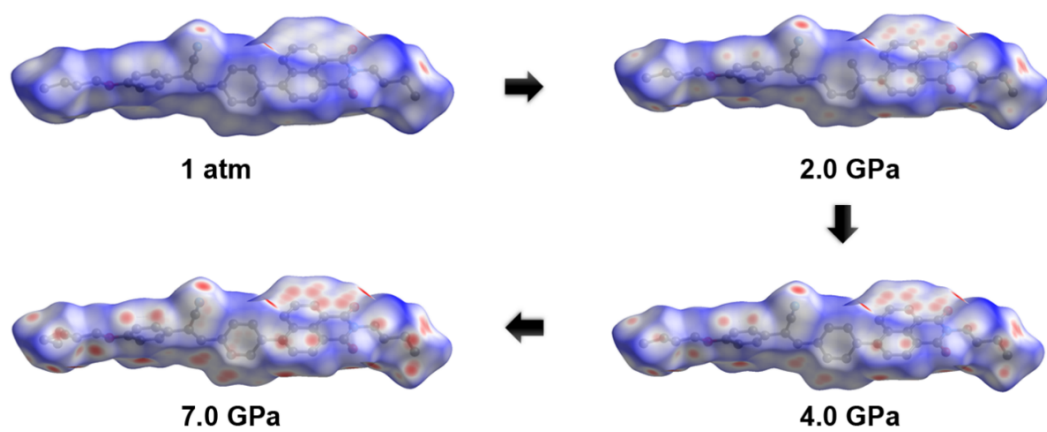

**Figure S12.** The Hirshfeld surface of NICN $\beta$ -4C molecule at selected pressures.

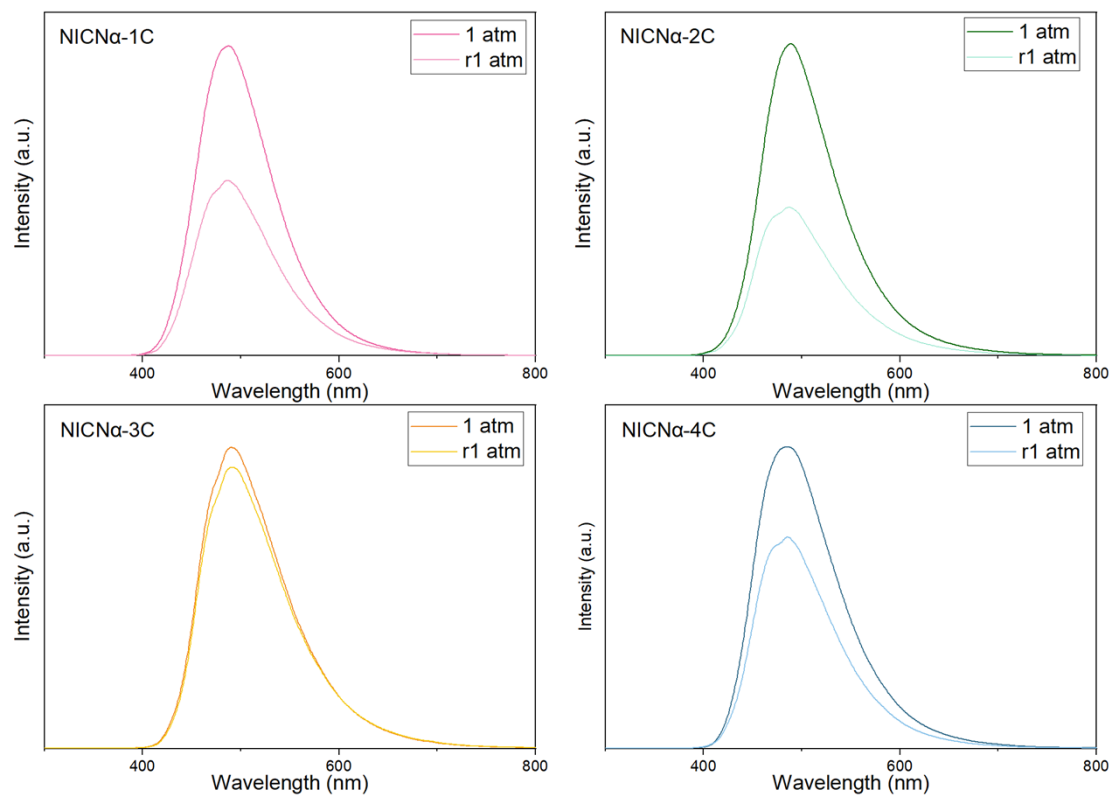

**Figure S13.** Emission spectra under ambient conditions and recovered emission spectra after high-pressure compression of NICN $\alpha$ -R.

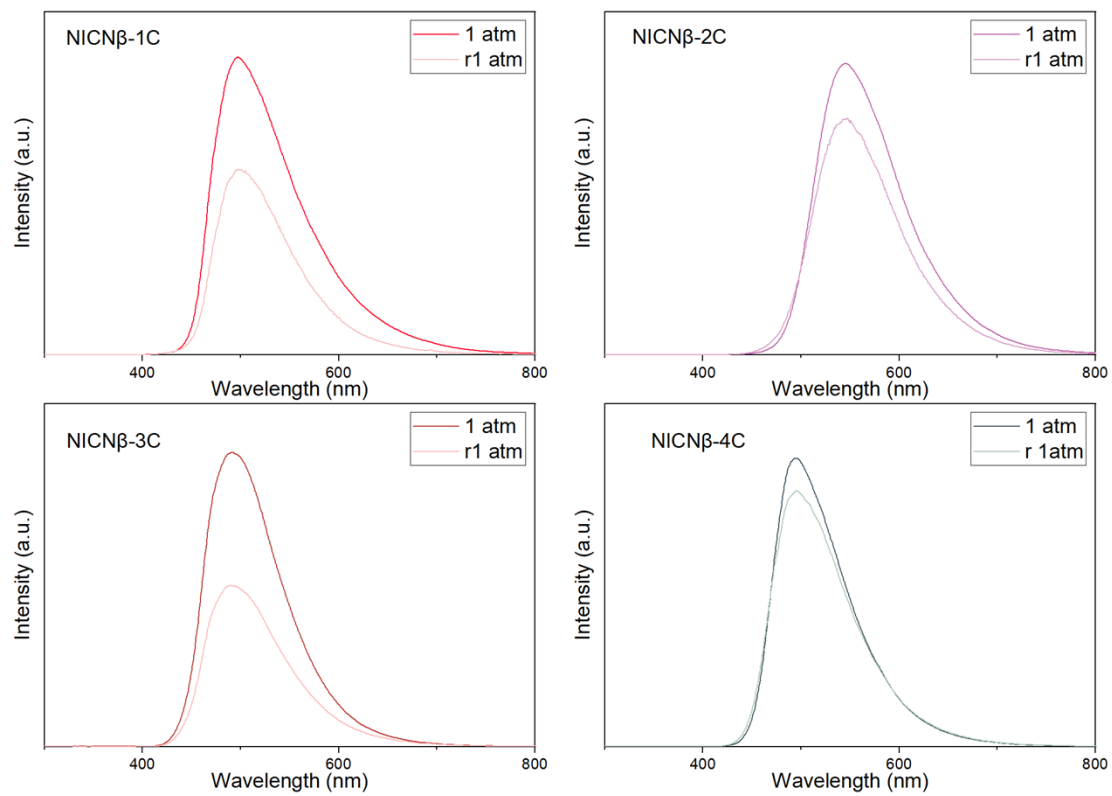

**Figure S14.** Emission spectra under ambient conditions and recovered emission spectra after high-pressure compression of NICNβ-R.



## Reference

1. Y. Ni, L. Yang, L. Kong, C. Wang, Q. Zhang and J. Yang, Highly efficient dual-state emission and two-photon absorption of novel naphthalimide functionalized cyanostilbene derivatives with finely tuned terminal alkoxy groups, *Mater. Chem. Front.*, 2022, **6**, 3522-3530.
2. J.-F. Luo, B.-C. Tang, C.-X. Gao, M. Li, Y.-H. Han and G.-T. Zou, Effects of high pressure on the Raman and fluorescence emission spectra of two novel 1,3,4-oxadiazole derivatives, *Chin. Phys.*, 2005, **14**, 1770.
3. H. Yuan, K. Wang, K. Yang, B. Liu and B. Zou, Luminescence properties of compressed tetraphenylethene: the role of intermolecular interactions, *J. Phys. Chem. Lett.*, 2014, **5**, 2968-2973.
4. X. Wang, Q. Liu, H. Yan, Z. Liu, M. Yao, Q. Zhang, S. Gong and W. He, Piezochromic luminescence behaviors of two new benzothiazole-enamido boron difluoride complexes: intra- and inter-molecular effects induced by hydrostatic compression, *Chem. Commun.*, 2015, **51**, 7497-7500.
5. Y. Zhang, Q. Song, K. Wang, W. Mao, F. Cao, J. Sun, L. Zhan, Y. Lv, Y. Ma, B. Zou and C. Zhang, Polymorphic crystals and their luminescence switching of triphenylacrylonitrile derivatives upon solvent vapour, mechanical, and thermal stimuli, *J. Mater. Chem. C*, 2015, **3**, 3049-3054.
6. X. Meng, G. Qi, X. Li, Z. Wang, K. Wang, B. Zou and Y. Ma, Spiropyran-based multi-colored switching tuned by pressure and mechanical grinding, *J. Mater. Chem. C*, 2016, **4**, 7584-7588.
7. Y. Zhang, M. Qile, J. Sun, M. Xu, K. Wang, F. Cao, W. Li, Q. Song, B. Zou and C. Zhang, Ratiometric pressure sensors based on cyano-substituted oligo(*p*-phenylene vinylene) derivatives in the hybridized local and charge-transfer excited state, *J. Mater. Chem. C*, 2016, **4**, 9954-9960.
8. S. Zhang, Y. Dai, S. Luo, Y. Gao, N. Gao, K. Wang, B. Zou, B. Yang and Y. Ma, Rehybridization of nitrogen atom induced photoluminescence enhancement under pressure stimulation, *Adv. Funct. Mater.*, 2017, **27**, 1602276.
9. Y. Li, Z. Ma, A. Li, W. Xu, Y. Wang, H. Jiang, K. Wang, Y. Zhao and X. Jia, A single crystal with multiple functions of optical waveguide, aggregation-induced emission, and mechanochromism, *ACS Appl. Mater. Interfaces*, 2017, **9**, 8910-8918.
10. A. Li, N. Chu, J. Liu, H. Liu, J. Wang, S. Xu, H. Cui, H. Zhang, W. Xu and Z. Ma, Pressure-induced remarkable luminescence switch of a dimer form of donor-acceptor-donor triphenylamine (TPA) derivative, *Mater. Chem. Front.*, 2019, **3**, 2768-2774.
11. M. Wu, H. Liu, H. Liu, T. Lu, S. Wang, G. Niu, L. Sui, F. Bai, B. Yang, K. Wang, X. Yang and B. Zou, Pressure-induced restricting intermolecular vibration of a herringbone dimer for significantly enhanced multicolor emission in rotor-free truxene crystals, *J. Phys. Chem. Lett.*, 2022, **13**, 2493-2499.
12. Y. Dai, H. Liu, T. Geng, R. Duan, X. Li, Y. Liu, W. Liu, B.-G. He, L. Sui, K. Wang, B. Zou, B. Yang and Y. Qi, Piezochromic fluorescence of anthracene derivative crystals with different stacking patterns designed around excimers, *J. Mater. Chem. C*, 2023, **11**, 4892-4898.
